# Supplementary material for: Ambient controlled synthesis of advanced core–shell plasmonic Ag@ZnO photocatalysts
Source: Royal Society of Chemistry journal article supplement (doi:10.1039/c6ce00013d), 2016-01-01
Supplement: c6ce00013d1.pdf [file c6ce00013d1.pdf]

## Supporting Information (SI)

### **Ambient controlled synthesis of advanced core-shell plasmonic Ag@ZnO photocatalysts**

*Jinyan Xiong<sup>a</sup>, Qiao Sun<sup>b</sup>, Jun Chen<sup>c</sup>, Zhen Li<sup>\*, a, b</sup>, and Shixue Dou<sup>a</sup>*

<sup>a</sup> Institute for Superconducting & Electronic Materials, The University of Wollongong, NSW 2500, Australia.

<sup>b</sup> School of Radiation Medicine and Radiation Protection, Collaborative Innovation Center of Radiation Medicine of Jiangsu Higher Education Institutions, Soochow University, 199 Ren Ai Road, Suzhou Industrial Park, Suzhou 215123, China.

<sup>c</sup> Intelligent Polymer Research Institute, The University of Wollongong, NSW 2500, Australia.

\*Corresponding author: E-mail: [zhenli@suda.edu.cn](mailto:zhenli@suda.edu.cn); [zhenl@uow.edu.au](mailto:zhenl@uow.edu.au)

Tel: +86-512-65882931; Fax: +86-512-65882931

**Table S1****Table S1** Experimental conditions for the synthesis of Ag@ZnO samples.

| Sample     | Ag <sup>a</sup> | Zn(NO <sub>3</sub> ) <sub>2</sub> 6H <sub>2</sub> O <sup>b</sup> | NaOH <sup>c</sup> | H <sub>2</sub> O |
|------------|-----------------|------------------------------------------------------------------|-------------------|------------------|
| <b>A1</b>  | NWs             | 0.6 M                                                            | 0.5 mL            | 14.5 mL          |
| <b>A2</b>  | NWs             | 0.6 M                                                            | 0.5 mL            | 1.167 mL         |
| <b>A3</b>  | NWs             | 0.6 M                                                            | 0.5 mL            | 2.5 mL           |
| <b>A4</b>  | NWs             | 0.6 M                                                            | 0.5 mL            | 6.5 mL           |
| <b>A5</b>  | NWs             | 0.6 M                                                            | 0.5 mL            | 22.5 mL          |
| <b>A6</b>  | NWs             | 0.3 M                                                            | 0.25 mL           | 14.75 mL         |
| <b>A7</b>  | NWs             | 1.2 M                                                            | 1 mL              | 14 mL            |
| <b>A8</b>  | NPs             | 0.6 M                                                            | 0.5 mL            | 1.167 mL         |
| <b>A9</b>  | NPs             | 0.6 M                                                            | 0.5 mL            | 2.5 mL           |
| <b>A10</b> | NPs             | 0.6 M                                                            | 0.5 mL            | 6.5 mL           |
| <b>A11</b> | NPs             | 0.6 M                                                            | 0.5 mL            | 14.5 mL          |
| <b>A12</b> | NPs             | 0.6 M                                                            | 0.5 mL            | 22.5 mL          |
| <b>A13</b> | NPs             | 0.3 M                                                            | 0.25 mL           | 14.75 mL         |
| <b>A14</b> | NPs             | 1.2 M                                                            | 1 mL              | 14 mL            |

**Note:** <sup>a</sup> The volume of silver nanowires or nanoparticles was 8 mL, <sup>b</sup> The volume of Zn(NO<sub>3</sub>)<sub>2</sub> 6H<sub>2</sub>O solution was 1 mL, <sup>c</sup> The concentration of NaOH was 4.8 M.

**Fig. S1**

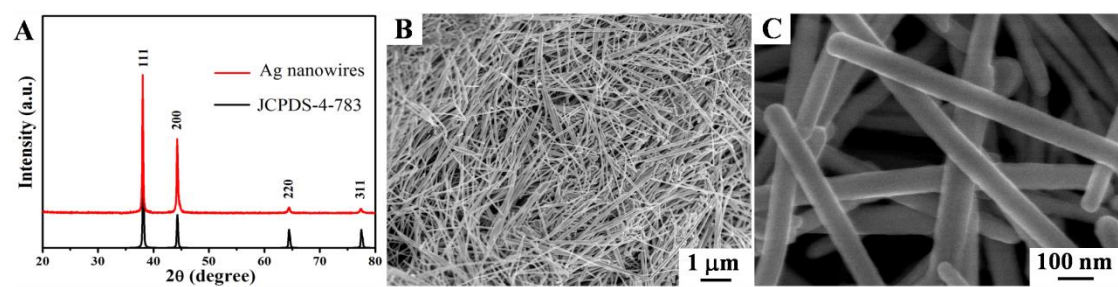

**Fig. S1** (A) XRD pattern and (B and C) SEM images of as-synthesized Ag NWs.

**Fig. S2**

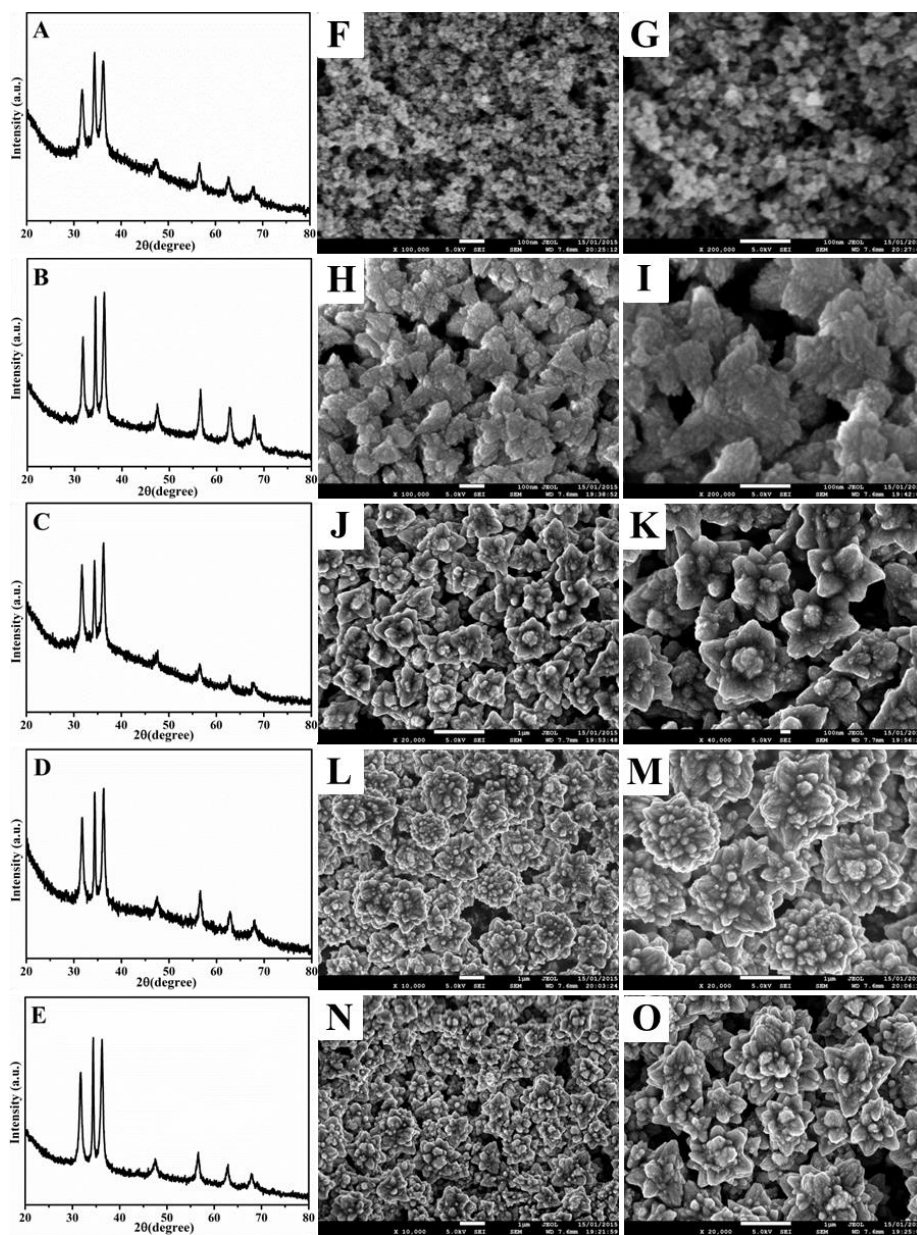

**Fig. S2** (A-E) XRD patterns, and SEM images of the products prepared in the presence of different volumes of water: (F and G) 1.167 mL, (H and I) 2.5 mL, (J and K) 6.5 mL, (L and M) 14.5 mL, and (N and O) 22.5 mL.

**Fig. S3**

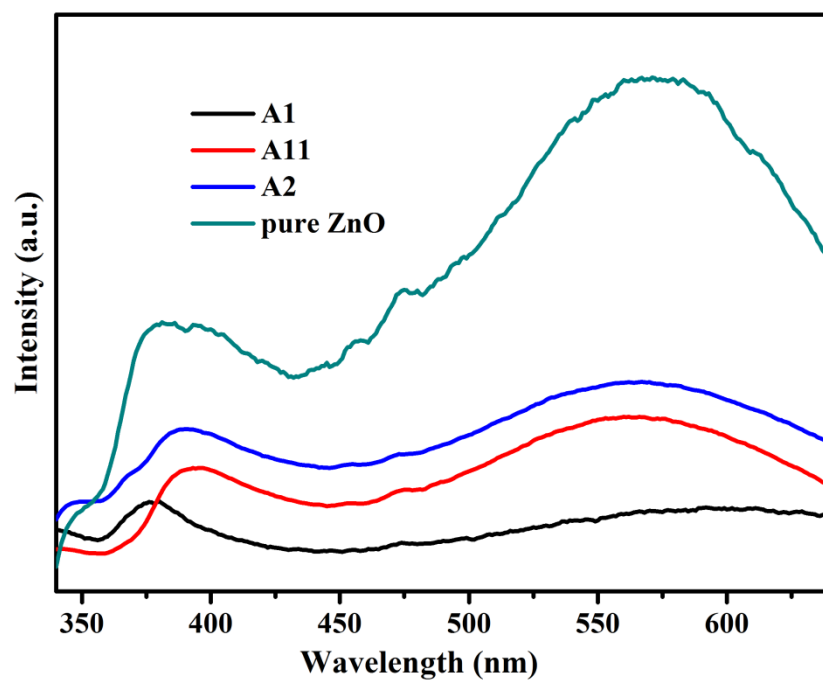

**Fig. S3** The PL spectra of A1, A11, A2, and pure ZnO with an excitation wavelength of 325 nm.
